# Supplementary material
Source: publisher figshare collection journal article supplement (https://acs.figshare.com/ndownloader/files/3881365)
Supplement: Supplementary file 1 [file 3881365]

Supporting Information

**Robust, Highly Thermally Stable, Core-Shell Nanostructured Metal Oxide Aerogels as High-Temperature Thermal Superinsulators, Adsorbents and Catalysts**

Guoqing Zu,<sup>a</sup> Jun Shen,<sup>a,\*</sup> Wenqin Wang,<sup>a</sup> Liping Zou,<sup>a</sup> Ya Lian,<sup>a</sup> Zhihua Zhang,<sup>a</sup> Bin Liu,<sup>b</sup> Fan Zhang<sup>b</sup>

<sup>a</sup>Shanghai Key Laboratory of Special Artificial Microstructure Materials and Technology, Pohl Institute of Solid State Physics, Tongji University, Shanghai 200092, P.R. China

<sup>b</sup>Aerospace Research Institute of Special Material and Processing Technology, Beijing 100074, P.R. China

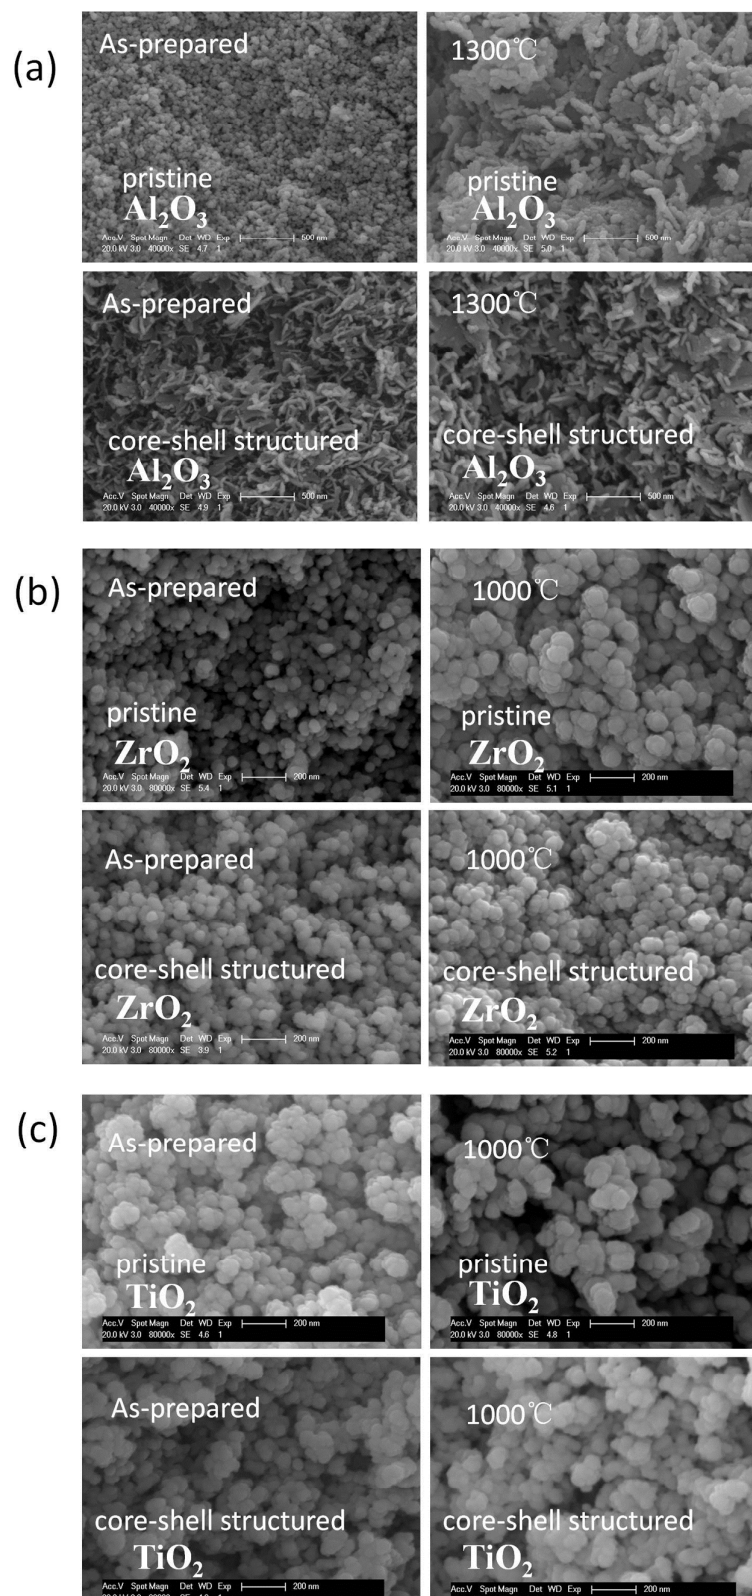

**Figure S1.** SEM images of typical pristine and core-shell nanostructured (a)  $\text{Al}_2\text{O}_3$ , (b)  $\text{ZrO}_2$  and (c)  $\text{TiO}_2$  aerogels before and after heat treatment at high temperatures.

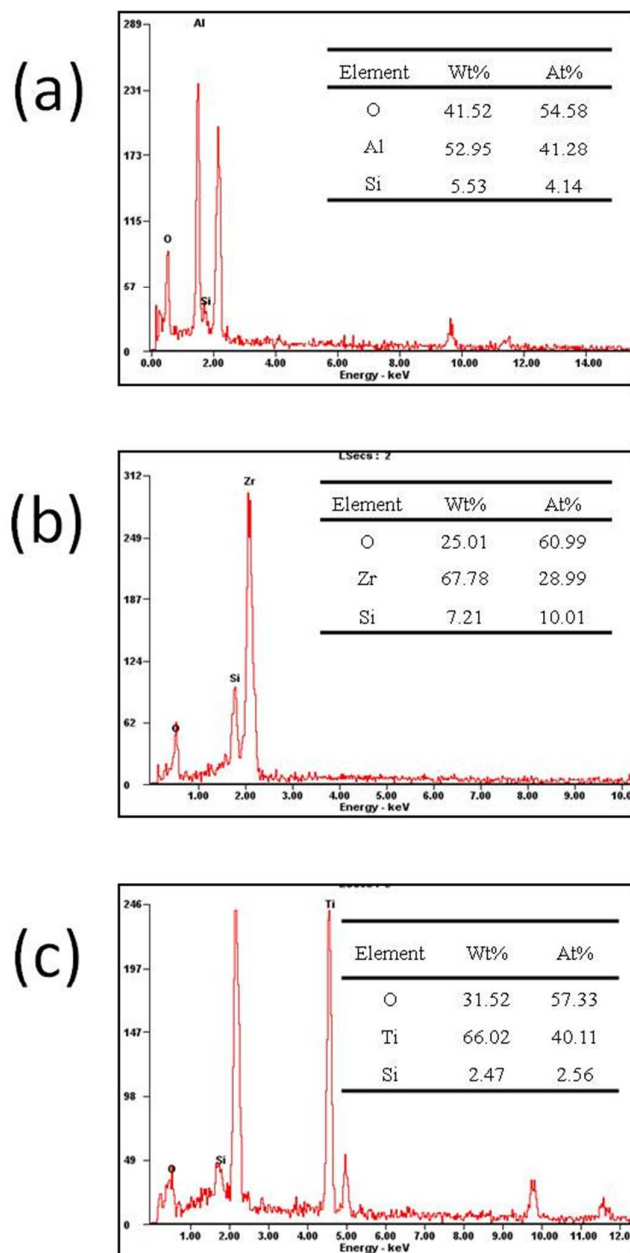

**Figure S2.** EDX elements analysis for core-shell nanostructured (a)  $\text{Al}_2\text{O}_3$ , (b)  $\text{ZrO}_2$  and (c)  $\text{TiO}_2$  aerogels.
